# Supplementary material for: Transcriptome and Volatilome Analysis During Growth of Brochothrix thermosphacta in Food: Role of Food Substrate and Strain Specificity for the Expression of Spoilage Functions
Source: Front Microbiol. 2019 Nov 8;10:2527. doi: 10.3389/fmicb.2019.02527 (PMC6856214; doi:10.3389/fmicb.2019.02527)
Supplement: TABLE S2 — Genes differentially expressed by B. thermosphacta CD337 and TAP175 when grown in beef or shrimp juice. Genes upregulated in beef compared to shrimp are detailed in the 1st sheet, those upregulated in shrimp juice compared to beef juice are detailed in the 2nd sheet. Genes upregulated by both strains are shown as well as genes specifically regulated in CD 337 or in TAP 175. Gene label, gene name and EC number of the encoded protein when available, are issued from genome annotation. The CD 337 complete genome was automatically annotated then manually cured (Illikoud et al., 2018b). For TAP 175 draft genome, cured annotations of CD 337 genome were transferred on the orthologous genes. For TAP 175 specific genes, initial automatic annotations were kept. Log Fold Change >2 are indicated. A color code indicates the level of upregulation. [file Table_2.XLSX]

## Sheet: Overexpressed in Beef
	Label Srain CD337	Equiv label strain TAP175	Name	EC number	Product	LFC - CD337	LFC - TAP175
Both strains	BTCD_v1_0023	BTTAP_v1_70050	guaC	1.7.1.7	GMP reductase (NADP-dependent)	2.21	3.61
	BTCD_v1_0159	BTTAP_v1_140002	-		putative biotin transporter BioY	3.89	2.7
	BTCD_v1_0177	BTTAP_v1_210004	-		conserved protein of unknown function	2.24	3.41
	BTCD_v1_0287	BTTAP_v1_90100	-		conserved membrane protein of unknown function	2.08	2.83
	BTCD_v1_0373	BTTAP_v1_160030	-		putative D-Ala-teichoic acid biosynthesis protein	2.6	3.63
	BTCD_v1_0512	BTTAP_v1_110022	fruA	2.7.1.69/2.7.1.202	phosphotransferase system (PTS) fructose-specific enzyme IIABC	2.92	2.09
	BTCD_v1_0523	BTTAP_v1_110033	-		putative transcriptional regulator of the potABCD operon	2.59	3.09
	BTCD_v1_0524	BTTAP_v1_110034	potA		spermidine/putrescine import ATP-binding protein PotA	2.5	2.69
	BTCD_v1_0525	BTTAP_v1_110035	potB		spermidine/putrescine transport system permease protein PotB	2.84	3.16
	BTCD_v1_0526	BTTAP_v1_110036	potC		spermidine/putrescine transport system permease protein PotC	3.07	3.15
	BTCD_v1_0527	BTTAP_v1_110037	potD		spermidine/putrescine-binding periplasmic protein	2.72	3
	BTCD_v1_0608	BTTAP_v1_130012	-		putative ABC-type transport system, permease component	3.81	2.33
	BTCD_v1_0632	BTTAP_v1_130036	purB	4.3.2.2	adenylosuccinate lyase	2.12	2.48
	BTCD_v1_0633	BTTAP_v1_130037	purC	6.3.2.6	phosphoribosylaminoimidazole succinocarboxamide synthetase	3.9	5.13
	BTCD_v1_0634	BTTAP_v1_130038	purS		factor for phosphoribosylformylglycinamidine synthetase activity	3.77	5.27
	BTCD_v1_0635	BTTAP_v1_130039	purQ	6.3.5.3	phosphoribosylformylglycinamidine synthetase I	3.5	4.54
	BTCD_v1_0636	BTTAP_v1_130040	purL	6.3.2.6	phosphoribosylformylglycinamidine synthetase II	2.88	3.53
	BTCD_v1_0637	BTTAP_v1_130041	purF	2.4.2.14	glutamine phosphoribosylpyrophosphate amidotransferase	2.15	2.6
	BTCD_v1_1012	BTTAP_v1_80098	-		membrane protein of unknown function	3.44	4.04
	BTCD_v1_1052	BTTAP_v1_80058	-		putative oligopeptide ABC transporter, AppA	2.3	2.38
	BTCD_v1_1061	BTTAP_v1_80048	yrdN	5.3.2.-	putative tautomerase -YolK	2.94	2.98
	BTCD_v1_1062	BTTAP_v1_80047	iolR		transcriptional regulator (DeoR family)	2.33	2.39
	BTCD_v1_1065	BTTAP_v1_80044	iolC	2.7.1.92	2-deoxy-5-keto-D-gluconic acid kinase	4.34	2.4
	BTCD_v1_1066	BTTAP_v1_80043	iolD	3.7.1.22	3D-(3,5/4)-trihydroxycyclohexane-1,2-dione hydrolase	4.68	2.79
	BTCD_v1_1067	BTTAP_v1_80042	iolE	4.2.1.44	2-keto-myo-inositol dehydratase	5.17	3.84
	BTCD_v1_1068	BTTAP_v1_80041	iolT		myo-inositol transporter	4.92	4
	BTCD_v1_1069	BTTAP_v1_80040	iolG	1.1.1.18	myo-inositol 2-dehydrogenase	5.34	3.89
	BTCD_v1_1070	BTTAP_v1_80039	iolH	5.3.-.-	sugar-phosphate epimerase/isomerase	5.26	4.31
	BTCD_v1_1071	BTTAP_v1_80038	iolI	5.3.99.11	inosose isomerase	5.1	4.37
	BTCD_v1_1072	BTTAP_v1_80037	iolJ	4.1.2.29	2-deoxy-5-keto-D-gluconic acid 6-phosphate aldolase	4.23	3.72
	BTCD_v1_1127	BTTAP_v1_20026	pyrR	2.4.2.9	bifunctional protein PyrR	2.11	3.03
	BTCD_v1_1128	BTTAP_v1_20027	pyrP		uracil permease	2.12	2.56
	BTCD_v1_1143	BTTAP_v1_20041 (68aa)	-		protein of unknown function	3.39	5
	BTCD_v1_1209	BTTAP_v1_20087	rpsP		ribosomal protein S16 (BS17)	2.31	2.37
	BTCD_v1_1292	BTTAP_v1_20156 (52aa)	-		protein of unknown function	2.97	3.07
	BTCD_v1_1428	BTTAP_v1_10357	eutQ	factor	ethanolamine utilization protein EutQ	2.24	2.41
	BTCD_v1_1429	BTTAP_v1_10356	eutH	transport	putative ethanolamine permease, EutH	2.32	2.25
	BTCD_v1_1430	BTTAP_v1_10355	eutN	metabolosome	putative ethanolamine utilization protein EutN	2.32	2.44
	BTCD_v1_1432	BTTAP_v1_10353	eutD	2.3.1.8	putative phosphotransacetylase EutD, similar to pduL	2.36	2.56
	BTCD_v1_1433	BTTAP_v1_10352	eutM	metabolosome	ethanolamine carboxysome structural protein, BMC family	3.22	2.51
	BTCD_v1_1508	BTTAP_v1_10281	pftA		pyruvate uptake system subunit A	5.19	5.51
	BTCD_v1_1509	BTTAP_v1_10280	pftB		pyruvate import system subunit B	4.12	4.04
	BTCD_v1_1750	BTTAP_v1_10036	rpmGA		ribosomal protein L33	2.14	2.93
	BTCD_v1_2045	BTTAP_v1_40039	-		conserved membrane protein of unknown function	2.08	2.24
	BTCD_v1_2225	BTTAP_v1_60127	cutR		putative HTH-type transcriptional repressor YcnK	2.04	2.05
	BTCD_v1_2241	BTTAP_v1_60110	-		protein of unknown function	3.51	2.46
	BTCD_v1_2248	BTTAP_v1_60103	-		conserved membrane protein of unknown function	2.31	2.38
	BTCD_v1_2310	BTTAP_v1_60044	-		putative ABC transporter permease	3.19	2.89
	BTCD_v1_2311	BTTAP_v1_60043	yxdL		ABC transporter (ATP-binding protein)	3.06	2.66
	BTCD_v1_2338	BTTAP_v1_60015	xapB		xanthosine transporter	3	2.22
	BTCD_v1_2339	BTTAP_v1_60014	pupG	2.4.2.1	purine nucleoside phosphorylase	2.74	2.32
	BTCD_v1_2384	BTTAP_v1_30194	-		putative transcriptional regulator	3.01	2.02
	BTCD_v1_2386	BTTAP_v1_30192	-		putative ABC-type Fe3+ transport system	6.78	4.48
	BTCD_v1_2387	BTTAP_v1_30191	-	3.6.3.-	putative ABC-type Fe3+ transport system	5.62	3.32
	BTCD_v1_2388	BTTAP_v1_30190	-		putative ABC-type Fe3+ transport system	5.39	3.56
	BTCD_v1_2389	BTTAP_v1_30189	nhaC		Na(+)/H(+) antiporter NhaC	2.33	2.14
	BTCD_v1_2396	BTTAP_v1_30182	ascR		transcriptional regulator of operon snaA-ytnM (LysR family)	3.44	5.11
	BTCD_v1_2397	BTTAP_v1_30181	-	1.5.1.29	putative FMN reductase NADPH-dependent	3.16	2.65
	BTCD_v1_2398	BTTAP_v1_30180	snaA		N-acetyltransferase acting on sulfur compounds	2.88	2.41
	BTCD_v1_2399	BTTAP_v1_30179	tcyJ		sulfur containing amino acid ABC transporter	4.01	2.3
	BTCD_v1_2401	BTTAP_v1_30177	tcyL		sulfur-containing amino acid ABC transporter (permease)	2.21	2.35
	BTCD_v1_2402	BTTAP_v1_30176	tcyM		sulfur-containing amino acid ABC transporter (permease)	2.43	2.07
	BTCD_v1_2549	BTTAP_v1_30021	-		putative ECF transporter, substrate-specific component	2.15	2.94
CD337 specific	BTCD_v1_0455	BTTAP_v1_120059	-		putative maltodextrin import ATP-binding protein MsmX	2.11	Non-DE
	BTCD_v1_0511	BTTAP_v1_110021	fruK	2.7.1.56	fructose-1-phosphate kinase	2.62	1.87
	BTCD_v1_0552	absent (46aa)	-		protein of unknown function	2.17	Abs
	BTCD_v1_0609	BTTAP_v1_130013	-		putative ABC-type transport system, ATPase component	3.67	1.77
	BTCD_v1_0653	BTTAP_v1_50114	yhfS	2.3.1.9	putative acetyl-CoA C-acetyltransferase	2.24	Non-DE
	BTCD_v1_0676	Absent	-		putative polysaccharide biosynthesis protein	2.03	Abs
	BTCD_v1_0718	BTTAP_v1_50156	-		putative Guanine/hypoxanthine permease PbuO	2	1.78
	BTCD_v1_0730	BTTAP_v1_50168	yqjM	1.6.99.1	NADPH-dependent flavin oxidoreductase	2.08	Non-DE
	BTCD_v1_1022	BTTAP_v1_80089	-	2.7.1.194	putative PTS system, IIB subunit	2.19	Non-DE
	BTCD_v1_1023	BTTAP_v1_80088	-	2.7.1.194	putative phosphotransferase transport system, IIC component	2.31	Non-DE
	BTCD_v1_1063	BTTAP_v1_80046	iolA	1.2.1.27, 1.2.1.18	methylmalonate-semialdehyde dehydrogenase	2.01	1.42
	BTCD_v1_1064	BTTAP_v1_80045	iolB	5.3.1.30	5-deoxy-D-glucuronic acid isomerase	3.62	1.96
	BTCD_v1_1215	Absent (291aa)	-		conserved protein of unknown function	2.12	Abs
	BTCD_v1_1216	Absent (245aa)	-		conserved protein of unknown function	2.35	Abs
	BTCD_v1_1427	Absent (25aa)	-		protein of unknown function	2.83	Abs
	BTCD_v1_1434	BTTAP_v1_10351	eutE	1.2.1.10	ethanolamine acetaldehyde oxydoreductase	2.6	1.87
	BTCD_v1_1435	BTTAP_v1_10350	eutK	metabolosome	putative ethanolamine utilization protein EutK	2.5	1.97
	BTCD_v1_1436	BTTAP_v1_10349	eutL	metabolosome	ethanolamine carboxysome structural protein, BMC family	2.08	1.41
	BTCD_v1_1437	BTTAP_v1_10348	eutC	4.3.1.7	ethanolamine ammonia lyase small subunit	2.22	1.36
	BTCD_v1_1612	BTTAP_v1_10178	trpA	4.2.1.20	tryptophan synthase alpha chain	3.57	Non-DE
	BTCD_v1_1613	BTTAP_v1_10177	trpB	4.2.1.20	tryptophan synthase (beta subunit)	3.3	Non-DE
	BTCD_v1_1614	BTTAP_v1_10176	trpF	5.3.1.24	N-(5'-phosphoribosyl)anthranilate isomerase	3.28	Non-DE
	BTCD_v1_1615	BTTAP_v1_10175	trpC	4.1.1.48	Indole-3-glycerol phosphate synthase	3.38	Non-DE
	BTCD_v1_1616	BTTAP_v1_10174	trpGD	2.4.2.18, 4.1.3.27	bifunctional protein TrpGD	3.48	Non-DE
	BTCD_v1_1617	BTTAP_v1_10173	trpE	4.1.3.27	anthranilate synthase component 1	3.21	Non-DE
	BTCD_v1_1735	BTTAP_v1_10054 (45aa)	-		protein of unknown function	2.06	Non-DE
	BTCD_v1_2011	BTTAP_v1_40008	-		protein of unknown function	2.09	1.89
	BTCD_v1_2028	BTTAP_v1_40023	spxA		redox-sensitive regulator	4.62	1.67
	BTCD_v1_2215	BTTAP_v1_60137	-		putative permease of the major facilitator superfamily	2.17	1.86
	BTCD_v1_2385	BTTAP_v1_30193	-		putative signal transduction histidine kinase	3.52	1.87
	BTCD_v1_2400	BTTAP_v1_30178	tcyK		sulfur-containing amino acid ABC transporter	2.11	1.83
	BTCD_v1_2553	BTTAP_v1_30017	-		membrane protein of unknown function	2.14	Non-DE
	BTCD_v1_misc_RNA_15	Absent	-		L19_leader	2.33	Abs
	BTCD_v1_tRNA4	BTTAP_v1_tRNA41	-		Thr tRNA	2.47	1.47
TAP175 specific	BTTAP_v1_100031	BTCD_v1_1818	-		conserved membrane protein of unknown function	Non-DE	2.42
	BTTAP_v1_100055	BTCD_v1_1840	-		conserved protein of unknown function	1.14	2.46
	BTTAP_v1_100056	Absent	-		ABC transporter ATP-binding protein	Abs	2.51
	BTTAP_v1_100057	Absent	-		conserved membrane protein of unknown function	Abs	2.78
	BTTAP_v1_100066	BTCD_v1_1904	-		putative oligopeptide ABC transporter, oppA	1.72	2.26
	BTTAP_v1_10007	BTCD_v1_1781	-		protein of unknown function	1.6	2.42
	BTTAP_v1_10008	BTCD_v1_1780	yrbF		component of the preprotein translocase	1.28	2.32
	BTTAP_v1_10039	BTCD_v1_1747	-		protein of unknown function	1.11	2.77
	BTTAP_v1_10066	BTCD_v1_1723	-		protein of unknown function	1.43	2.42
	BTTAP_v1_10118	BTCD_v1_1670	-		protein of unknown function	1.53	2.6
	BTTAP_v1_10119	BTCD_v1_1669	-		putative permease	1.53	3.59
	BTTAP_v1_10146	Absent	-		conserved protein of unknown function	Abs	2.25
	BTTAP_v1_10245	Absent	-		conserved protein of unknown function	Abs	2.23
	BTTAP_v1_10261	BTCD_v1_1528 (1529)	-		putative transcriptional regulator	Non-DE	2.4
	BTTAP_v1_10269	Absent	-		putative restriction endonuclease BglII	Abs	2.23
	BTTAP_v1_10282	BTCD_v1_1507	-		membrane protein of unknown function	1.41	2.37
	BTTAP_v1_10324	BTCD_v1_1461	-		putative ABC transporter permease protein YesP	1.75	3.85
	BTTAP_v1_10325	BTCD_v1_1460	ytcP		putative ABC transporter (permease)	1.76	3.2
	BTTAP_v1_10326	BTCD_v1_1459	-		conserved exported protein of unknown function	0.86	2.56
	BTTAP_v1_10327	BTCD_v1_1458	-		putative integral inner membrane component, YesV	1.39	2.22
	BTTAP_v1_10402	absent	-		conserved protein of unknown function	Abs	3.43
	BTTAP_v1_110019	BTCD_v1_0509	-		protein of unknown function	Non-DE	2.72
	BTTAP_v1_110060	BTCD_v1_0550	-		putative glutamine amidotransferase	1.93	2.87
	BTTAP_v1_110080	BTCD_v1_0571	-		conserved protein of unknown function	1.08	3.16
	BTTAP_v1_110083	BTCD_v1_0574	-		putative Acetyltransferase	1.37	2.55
	BTTAP_v1_110084	BTCD_v1_0575	-		protein of unknown function	Non-DE	2.38
	BTTAP_v1_120033	Absent	-		putative response regulator of the LytR/AlgR family	Abs	2.41
	BTTAP_v1_120034	Absent	-		conserved membrane protein of unknown function	Abs	2.06
	BTTAP_v1_120035	Absent	-		conserved membrane protein of unknown function	Abs	2.32
	BTTAP_v1_130022	BTCD_v1_0618	ykuJ		putative RNA-specific modification enzyme	1.74	2.32
	BTTAP_v1_130023	BTCD_v1_0619	ykuL		putative RNA-binding protein	1.67	2.17
	BTTAP_v1_130042	BTCD_v1_0638	purM		phosphoribosylaminoimidazole synthetase	1.8	2.19
	BTTAP_v1_130043	BTCD_v1_0639	purN		phosphoribosylglycinamide formyltransferase	1.42	2.22
	BTTAP_v1_160010	Absent (69 aa)	-		conserved protein of unknown function	Abs	2.08
	BTTAP_v1_170002	BTCD_v1_1946	-		membrane protein of unknown function	1.27	2.13
	BTTAP_v1_170027	BTCD_v1_1997	-		protein of unknown function	Non-DE	2.86
	BTTAP_v1_200016	Absent	-		conserved protein of unknown function	Abs	2.04
	BTTAP_v1_200017	Absent	immR		ICEBs1 mobile element: transcriptional regulator (Xre family)	Abs	2.11
	BTTAP_v1_200018	Absent	-		conserved protein of unknown function	Abs	3.03
	BTTAP_v1_200019	Absent	-		conserved protein of unknown function	Abs	2.51
	BTTAP_v1_20024	BTCD_v1_1125	lspA		signal peptidase II	1.53	2.54
	BTTAP_v1_20052	BTCD_v1_1155	rpoZ		omega subunit of RNA polymerase	1.78	2.17
	BTTAP_v1_20063	BTCD_v1_1173	yqhY		putative alkaline shock protein	1.29	2.15
	BTTAP_v1_20070	BTCD_v1_1180	acpA		acyl carrier protein	1.79	2.24
	BTTAP_v1_20088	BTCD_v1_1210	ylqD		conserved hypothetical protein	1.82	2.02
	BTTAP_v1_20109	BTCD_v1_1245	sipS		type I signal peptidase	1.5	2.07
	BTTAP_v1_20126	BTCD_v1_1263	-		protein of unknown function	1.32	2.43
	BTTAP_v1_20135	Absent	-		conserved protein of unknown function	Abs	2.64
	BTTAP_v1_20141	Absent	-		DNA helicase	Abs	2.18
	BTTAP_v1_20143	Absent	-		protein of unknown function	Abs	2.2
	BTTAP_v1_20151	BTCD_v1_1279	-		putative ABC transporter, ATP binding protein	Non-DE	2.44
	BTTAP_v1_20159	Absent	-		DNA-binding protein	Abs	2.31
	BTTAP_v1_20171	BTCD_v1_1107	-		conserved protein of unknown function	Non-DE	3.33
	BTTAP_v1_20172	BTCD_v1_1203	-		conserved exported protein of unknown function	Non-DE	2.6
	BTTAP_v1_20206	Absent (frgt BTCD_V1_1338)	-		conserved protein of unknown function	Abs	2.02
	BTTAP_v1_210005	BTCD_v1_0178	-		conserved protein of unknown function	1.19	2.32
	BTTAP_v1_230003	Absent	-		conserved protein of unknown function	Abs	2.39
	BTTAP_v1_230005	Absent	-		conserved protein of unknown function	Abs	2.1
	BTTAP_v1_230006	Absent	-		conserved protein of unknown function	Abs	3.77
	BTTAP_v1_230007	Absent	-		conserved exported protein of unknown function	Abs	2.13
	BTTAP_v1_30030	Absent (54 aa)	-		protein of unknown function	Abs	2.11
	BTTAP_v1_30064	BTCD_v1_2503	-		putative CDP-glycerol glycerophosphotransferase	Non-DE	2.48
	BTTAP_v1_30084	Absent	coaC		putative phosphopantothenoylcysteine decarboxylase	Abs	2.14
	BTTAP_v1_30088	Absent	-		conserved protein of unknown function	Abs	3.76
	BTTAP_v1_30203	BTCD_v1_2375	pbuX		xanthine permease	1.33	2.24
	BTTAP_v1_30205	BTCD_v1_2373	bglP		beta-glucoside-specific PTS enzyme IIABC component	1.83	2.9
	BTTAP_v1_40009	BTCD_v1_2014	-		conserved protein of unknown function	Non-DE	2.08
	BTTAP_v1_40026	BTCD_v1_2032	-		protein of unknown function	0.78	2.38
	BTTAP_v1_40070	BTCD_v1_2077	-		protein of unknown function	Non-DE	2.54
	BTTAP_v1_40074	BTCD_v1_2081	ykaA		putative PitB transporter accessory protein	1.99	2.25
	BTTAP_v1_40092	Absent	-		conserved protein of unknown function	Abs	2.65
	BTTAP_v1_40114	BTCD_v1_2118	-		putative transcriptional regulator (Lrp/AsnC family)	Non-DE	2.2
	BTTAP_v1_40132	BTCD_v1_2139	-		conserved protein of unknown function	Non-DE	2.12
	BTTAP_v1_40145	BTCD_v1_2153	-		exported protein of unknown function	1.5	2.29
	BTTAP_v1_50011	BTCD_v1_0863	-		putative signal peptidase I (sipA)	Non-DE	2.04
	BTTAP_v1_50016	BTCD_v1_0858	rpsT		30S ribosomal protein S20	1.57	2.03
	BTTAP_v1_50053	BTCD_v1_0824	-		exported protein of unknown function	Non-DE	4.08
	BTTAP_v1_50123	BTCD_v1_0685	msrC		free methionine-(R)-sulfoxide reductase	1.21	2.35
	BTTAP_v1_50157	BTCD_v1_0719	-		putative integral membrane protein, chromosome condensation	Non-DE	2.01
	BTTAP_v1_50170	BTCD_v1_0732	-		conserved protein of unknown function	1.19	2.03
	BTTAP_v1_60076	BTCD_v1_2278	-		putative oligopeptide ABC transporter, OppA	Non-DE	2.71
	BTTAP_v1_60092	BTCD_v1_2262	-		putative lipoprotein NlpA family	1.44	2.13
	BTTAP_v1_60108	BTCD_v1_2243	pbuG		hypoxanthine/guanine permease	1.92	3.33
	BTTAP_v1_60124	BTCD_v1_2228	cspC		cold-shock protein	Non-DE	2.08
	BTTAP_v1_70071	BTCD_v1_0004	-		exported protein of unknown function	1.64	2.09
	BTTAP_v1_70077	BTCD_v1_2633	rnpA		component RNase P, protein C5 substrate specificity	1.28	2.74
	BTTAP_v1_80003	BTCD_v1_1104	-		conserved protein of unknown function	Non-DE	3.02
	BTTAP_v1_80092	BTCD_v1_1019	-		protein of unknown function	1.29	2.24
	BTTAP_v1_90101	BTCD_v1_0288	-		protein of unknown function	Non-DE	2.08
	BTTAP_v1_miscRNA13	BTCD_v1_misc_RNA_1	-		PyrR	1.83	2.57
	BTTAP_v1_miscRNA14	BTCD_v1_misc_RNA_1	-		PyrR	1.83	3
	BTTAP_v1_miscRNA22	Absent	-		RatA	Abs	3.02
	BTTAP_v1_miscRNA80	Absent	-		yybP-ykoY	Abs	3.39
	BTTAP_v1_miscRNA81	Absent	-		L20_leader	Abs	2.34
	BTTAP_v1_tRNA34	BTCD_v1_tRNA22	-		Phe tRNA	1.69	2.21
	BTTAP_v1_tRNA58	BTCD_v1_tRNA19; 79	-		Val tRNA	1,49; 1,27	2.95
	BTTAP_v1_tRNA59	BTCD_v1_tRNA23; 80	-		Tyr tRNA	1,24; 1,59	2.27
	BTTAP_v1_tRNA61	BTCD_v1_tRNA5; 37; 82	-		Lys tRNA	1.93; 1.36; 1,33	0.05

## Sheet: Overexpressed in Shrimp
	Label strain 1	Equiv label strain 2	Name	EC number	Product	LFC CD337	LFC TAP175
Both strains	BTCD_v1_0235	BTTAP_v1_90041	-		putative ComF operon protein A, helicase competence protein	2.01	2.51
	BTCD_v1_0267	BTTAP_v1_90074	gabD	1.2.1.24	succinate-semialdehyde dehydrogenase	3.18	4.71
	BTCD_v1_0268	BTTAP_v1_90075	-		protein of unknown function	2.48	3.74
	BTCD_v1_0292	BTTAP_v1_90105	tpiA	5.3.1.1	triose phosphate isomerase	2.05	2.53
	BTCD_v1_0293	BTTAP_v1_90106	pgm	5.4.2.12	phosphoglycerate mutase	2.14	2.67
	BTCD_v1_0345	BTTAP_v1_300001	-		protein of unknown function	2.3	2.81
	BTCD_v1_0398	BTTAP_v1_120013	copZ		copper insertion chaperone and transporter component	2.57	3.27
	BTCD_v1_0399	BTTAP_v1_120014	copA		copper transporter ATPase	4.32	6.24
	BTCD_v1_0400	BTTAP_v1_120015	-		conserved protein of unknown function	3.24	3.24
	BTCD_v1_0531	BTTAP_v1_110041	-		protein of unknown function	3.3	3.64
	BTCD_v1_0723	BTTAP_v1_50161	-	1.6.5.5	putative Zn-dependent oxidoreductase	2.51	2.79
	BTCD_v1_0727	BTTAP_v1_50165	groEL		chaperonin large subunit	2.74	2.8
	BTCD_v1_0753	BTTAP_v1_130064	-		conserved protein of unknown function	4.04	3.83
	BTCD_v1_0755	BTTAP_v1_130062	hrcA		transcriptional regulator of heat-shock genes	2.53	2.29
	BTCD_v1_0756	BTTAP_v1_130061	grpE		nucleotide exchange factor for DnaK activity	2.26	2.32
	BTCD_v1_0757	BTTAP_v1_130060	dnaK		molecular chaperone, ATP-dependent	2.43	2.68
	BTCD_v1_0851	BTTAP_v1_50024	comEA		membrane bound high-affinity DNA-binding receptor	2.34	3.35
	BTCD_v1_0869	BTTAP_v1_50005	-		protein of unknown function	2.21	2.23
	BTCD_v1_0891	BTTAP_v1_190018	-		putative nucleotide- or NAD- binding protein	2.87	3.61
	BTCD_v1_1031	BTTAP_v1_80080	garK	2.7.1.165	glycerate 2-kinase	2.12	2.36
	BTCD_v1_1042	BTTAP_v1_80069	-	1.2.1.76	putative succinate-semialdehyde dehydrogenase (acetylating)	4.28	3
	BTCD_v1_1058	BTTAP_v1_80051	nagA	3.5.1.25	N-acetylglucosamine-6-phosphate deacetylase	2.21	2.47
	BTCD_v1_1077	BTTAP_v1_80032	-		conserved protein of unknown function	2.1	2.86
	BTCD_v1_1133	BTTAP_v1_20032	pyrK	1.3.98.1	dihydroorotate dehydrogenase (electron transfer subunit)	2.46	2.54
	BTCD_v1_1134	BTTAP_v1_20033	pyrD	1.3.1.14	dihydroorotate dehydrogenase (catalytic subunit)	2.76	2.87
	BTCD_v1_1135	BTTAP_v1_20034	pyrF	4.1.1.23	orotidine 5'-phosphate decarboxylase	2.92	3.04
	BTCD_v1_1136	BTTAP_v1_20035	pyrE	2.4.2.10	orotate phosphoribosyltransferase	3.35	3.48
	BTCD_v1_1296	BTTAP_v1_20161	pdxT	3.5.1.2, 4.3.3.6	glutamine amidotransferase subunit PdxT	3.86	5.32
	BTCD_v1_1297	BTTAP_v1_20162	pdxS	4.3.3.6	glutamine amidotransferase , pdxS synthase subunit	3.53	4.65
	BTCD_v1_1300	BTTAP_v1_20165	-	3.1.1.-	putative Esterase/lipase	2.09	2.03
	BTCD_v1_1326	BTTAP_v1_20192	-		putative acetyltransferase	3.51	3.13
	BTCD_v1_1339	BTTAP_v1_20207	-		stress response regulator gls24 homolog	2.12	2.54
	BTCD_v1_1344	BTTAP_v1_20220	vmlR		ATP-binding cassette efflux transporter	2.91	4.27
	BTCD_v1_1410	BTTAP_v1_10372	hisIE	3.5.4.19, 3.6.1.31	phosphoribosyl-AMP cyclohydrolase	2.41	3.76
	BTCD_v1_1411	BTTAP_v1_10371	hisF	2.4.2.-	imidazole glycerol phosphate synthase subunit	2.3	4.68
	BTCD_v1_1412	BTTAP_v1_10370	hisA	5.3.1.16	P-ribosylformimino-5-aminoimidazole carboxamide ribotide isomerase	2.51	5.2
	BTCD_v1_1413	BTTAP_v1_10369	hisH	transport	imidazole glycerol phosphate synthase	2.44	4.58
	BTCD_v1_1414	BTTAP_v1_10368	hisB	4.2.1.19	imidazoleglycerol-phosphate dehydratase [Mn(II)-dependent]	2.5	4.07
	BTCD_v1_1415	BTTAP_v1_10367	hisD	1.1.1.23	histidinol dehydrogenase	2.67	4.57
	BTCD_v1_1416	BTTAP_v1_10366	hisG	2.4.2.17	ATP phosphoribosyltransferase	2.46	3.61
	BTCD_v1_1417	BTTAP_v1_10365	hisZ	2.4.2.17	ATP phosphoribosyltransferase regulatory subunit	2.27	2.36
	BTCD_v1_1483	BTTAP_v1_10304	-		conserved protein of unknown function	2.45	3.24
	BTCD_v1_1593	BTTAP_v1_10198	mdxK	2.4.1.8	maltose phosphorylase	2.37	3.57
	BTCD_v1_1648	BTTAP_v1_10142	-		protein of unknown function	2.45	2.8
	BTCD_v1_1700	BTTAP_v1_10088	nnrD	4.2.1.136	putative ADP-dependent (S)-NAD(P)H-hydrate dehydratase	2.5	2.09
	BTCD_v1_1922	BTTAP_v1_100082	argD	2.6.1.11	N-acetylornithine aminotransferase	2.7	3.19
	BTCD_v1_1923	BTTAP_v1_100083	argB	2.7.2.8	acetylglutamate kinase	3.29	3.42
	BTCD_v1_2004	BTTAP_v1_40001	yvgN	1.1.1.283	methylglyoxal reductase (NADPH-dependent).	2.63	3.89
	BTCD_v1_2039	BTTAP_v1_40034	gpmA	5.4.2.1	phosphoglyceromutase	2.97	3.2
	BTCD_v1_2040-2041 (2 fragments)	BTTAP_v1_40035	clpB		chaperone protein ClpB	2.67/2.67	2.75
	BTCD_v1_2108	BTTAP_v1_40103	-	1.14.14.3	putative FMN-dependentoxidoreductase	2.56	2.61
	BTCD_v1_2121	BTTAP_v1_40117	-		putative zinc-containing alcohol dehydrogenase superfamily (fragment)	2.85	3.42
	BTCD_v1_2137	BTTAP_v1_40130	tiaE	1.1.1.79, 1.1.1.81	2-oxo-carboxylic acid reductase	2.03	2.21
	BTCD_v1_2142	BTTAP_v1_40135	-		putative pyruvate oxidase, thiamin-dependent, FAD-binding	2	3.44
	BTCD_v1_2296	BTTAP_v1_60058	levD		mannose-specific PTS enzymes: IIA component	5.05	3.87
	BTCD_v1_2297	BTTAP_v1_60057	levE		mannose-specific PTS enzymes: IIB component	4.66	3.37
	BTCD_v1_2298	BTTAP_v1_60056	levF		mannose-specific PTS enzyme IIC component	4.41	3.62
	BTCD_v1_2299	BTTAP_v1_60055	levG		mannose-specific PTS enzyme IID component	3.16	2.82
	BTCD_v1_2369	BTTAP_v1_30208	bglH	3.2.1.86	aryl-phospho-beta-d-glucosidase	2.36	2.53
	BTCD_v1_2370	BTTAP_v1_30207	bglH	3.2.1.86	aryl-phospho-beta-d-glucosidase	2.05	2.38
	BTCD_v1_2378	BTTAP_v1_30200	bglP		PTS system, beta-glucoside-specific IIABC component	3.05	3.11
	BTCD_v1_2426	BTTAP_v1_30156 (105aa)	-		conserved protein of unknown function	2.26	2.24
	BTCD_v1_2603	BTTAP_v1_70107	-		putative transcriptional regulator MtlR with PTS EIIAB components	2.15	2.75
	BTCD_v1_2604	BTTAP_v1_70106	mtlA		mannitol-specific PTS enzyme IIABC component	3.5	3.45
	BTCD_v1_2621	BTTAP_v1_70089	-		protein of unknown function	2.4	2.46
	BTCD_v1_misc_RNA_13	BTTAP_v1_miscRNA72	-		RNaseP_bact_b	2.75	3.96
	BTCD_v1_misc_RNA_2	BTTAP_v1_miscRNA35	-		6S	2.77	2.59
	BTCD_v1_misc_RNA_27	BTTAP_v1_miscRNA19	-		TPP	2.06	2.45
	BTCD_v1_misc_RNA_28	BTTAP_v1_miscRNA43	-		TPP	2.17	2.16
	BTCD_v1_tRNA24	BTTAP_v1_tRNA26	-		Trp tRNA	2.39	2.89
	BTCD_v1_tRNA29	BTTAP_v1_tRNA31	-		Leu tRNA	2.1	2.43
	BTCD_v1_tRNA77	BTTAP_v1_tRNA61	-		Lys tRNA	3.42	-2.05
	BTCD_v1_tRNA83	BTTAP_v1_tRNA62	-		Gly tRNA	3.02	3.5
	BTCD_v1_tRNA85	BTTAP_v1_tRNA56	-		Arg tRNA	3.49	3.7
CD337 specific	BTCD_v1_0057	BTTAP_v1_70016	-		putative cation efflux protein	2.28	Non-DE
	BTCD_v1_0237	BTTAP_v1_90043	hpf		ribosome-associated sigma 54 modulation protein	2.46	1.64
	BTCD_v1_0265	BTTAP_v1_90072	hprK		serine/threonine protein kinase/phosphorylase	2.02	1.88
	BTCD_v1_0289	BTTAP_v1_90102	cggR		transcriptional regulator of GapA	2.11	1.6
	BTCD_v1_0295	BTTAP_v1_90109	-		protein of unknown function	2.13	Non-DE
	BTCD_v1_0346	Absent	-		protein of unknown function	2.12	Abs
	BTCD_v1_0435	BTTAP_v1_120037	-		protein of unknown function	2.28	1.62
	BTCD_v1_0607	BTTAP_v1_130011	-		conserved protein of unknown function	2.02	1.82
	BTCD_v1_0726	BTTAP_v1_50164	groES		chaperonin small subunit	2.01	1.41
	BTCD_v1_0799	BTTAP_v1_50076	hbs		non-specific DNA-binding protein HBsu	2.32	1.74
	BTCD_v1_0957	absent (87aa)	-		protein of unknown function	2.32	Abs
	BTCD_v1_0975	BTTAP_v1_80128	-		putative thioredoxin/glutaredoxin-like protein	2.2	1.46
	BTCD_v1_1043	BTTAP_v1_80068	-		uncharacterized conserved protein	2.94	1.81
	BTCD_v1_1059	BTTAP_v1_80050	nagB	3.5.99.6	N-acetylglucosamine-6-phosphate isomerase	2.15	1.13
	BTCD_v1_1343	BTTAP_v1_20219 (fragment)	-		protein of unknown function	2.89	3.96
	BTCD_v1_1420	BTTAP_v1_10362 (71aa)	-		conserved protein of unknown function	2.4	0.87
	BTCD_v1_1642	BTTAP_v1_10147 (99aa)	-		protein of unknown function	2.21	1.55
	BTCD_v1_1649	BTTAP_v1_10141 (95aa)	-		putative Immunity protein	2.15	1.89
	BTCD_v1_1924	BTTAP_v1_100084	argJ	2.3.1.35, 2.3.1.1	ornithine acetyltransferase; amino-acid acetyltransferase	2.29	1.8
	BTCD_v1_1930	BTTAP_v1_100089	-		conserved exported protein of unknown function	2.09	1.58
	BTCD_v1_1944	BTTAP_v1_100103 (165aa)	-		conserved membrane protein of unknown function	2.49	3.73
	BTCD_v1_1951	BTTAP_v1_40093	-		putative transposase	2.56	-1.24
	BTCD_v1_1952	Absent (60aa)	-		protein of unknown function	2.29	Abs
	BTCD_v1_1953	Absent (207aa)	-		putative recombinase resolvase	2.36	Abs
	BTCD_v1_2109	BTTAP_v1_40104	mhqA	1.13.11.-	hydroquinone-specific extradiol dioxygenase	2.13	1.92
	BTCD_v1_2214	BTTAP_v1_60138	-		conserved protein of unknown function	2.18	1.48
	BTCD_v1_2343	BTTAP_v1_60010	-		protein of unknown function	2.22	Non-DE
	BTCD_v1_2407	Absent (44aa)	-		conserved protein of unknown function	2.94	Abs
	BTCD_v1_2411	BTTAP_v1_30169 (fragment)	-		protein of unknown function	2.07	2.35
	BTCD_v1_2598	BTTAP_v1_50089	-		protein of unknown function	3.03	Non-DE
	BTCD_v1_2599	Absent	-		protein of unknown function	2.72	Abs
	BTCD_v1_2600	BTTAP_v1_70110	-		conserved protein of unknown function	2.82	1.38
	BTCD_v1_misc_RNA_29	Absent	-		SRP_bact	2.76	Abs
	BTCD_v1_misc_RNA_33	Absent	-		5S_rRNA	2.63	Abs
TAP175 specific	BTTAP_v1_100094	BTCD_v1_1935	pheT	6.1.1.20	phenylalanyl-tRNA synthetase (beta subunit)	0.82	2.02
	BTTAP_v1_100102	Absent	-		protein of unknown function	Abs	3.85
	BTTAP_v1_100103	Absent	-		conserved protein of unknown function	Abs	3.73
	BTTAP_v1_10016	BTCD_v1_1771	dtd		D-Tyr-tRNATyr deacylase	1.39	2.11
	BTTAP_v1_10059	BTCD_v1_1730	glcK	2.7.1.2, 2.7.1.59	glucose kinase	1.48	2.37
	BTTAP_v1_10062	BTCD_v1_1727	-		putative late competence protein ComGC	Non-DE	2.41
	BTTAP_v1_10082	BTCD_v1_1706	papA		aminopeptidase (Met-Xaa and Xaa-Pro)	1.61	2.3
	BTTAP_v1_10090	BTCD_v1_1698	dat	2.6.1.21	D-alanine aminotransferase	1.46	2.22
	BTTAP_v1_10124	BTCD_v1_1664	-		Putative phage tail protein	1.04	2.02
	BTTAP_v1_10126	BTCD_v1_1662	-		conserved protein of unknown function	1.31	2.03
	BTTAP_v1_10127	BTCD_v1_1661	-		membrane protein of unknown function	1.37	2.23
	BTTAP_v1_10129	BTCD_v1_1659	-		protein of unknown function	1.43	2.34
	BTTAP_v1_10143	Absent	-		conserved protein of unknown function	Abs	2.31
	BTTAP_v1_10196	BTCD_v1_1595	-		putative maltose PTS system, IIBC component	1.22	2.04
	BTTAP_v1_10199	BTCD_v1_1592	mdxM	5.4.2.6, 2.7.1.41	beta-phosphoglucomutase / glucose-1-phosphate phosphodismutase	1.55	2.84
	BTTAP_v1_10272	BTCD_v1_1517	-		putative anti-sigma-M factor	1.19	2.02
	BTTAP_v1_10305	BTCD_v1_1482	-		conserved protein of unknown function	0.88	2.24
	BTTAP_v1_10341	BTCD_v1_1443	eutG	1.1.1.1	ethanolamine iron-dependent Alcohol dehydrogenase	1.93	2
	BTTAP_v1_110001	Absent	-		conserved protein of unknown function	Abs	2
	BTTAP_v1_110029	BTCD_v1_0519	lutC		lactate utilization protein C	Non-DE	2.2
	BTTAP_v1_110039	BTCD_v1_0529	-		putative esterase/lipase	1.79	2.38
	BTTAP_v1_110044	BTCD_v1_0534	katA	1.11.1.6	vegetative catalase 1	1.03	2.34
	BTTAP_v1_110099	BTCD_v1_0591	polA		DNA polymerase I	1.46	2.41
	BTTAP_v1_110100	BTCD_v1_0592	mutM		formamidopyrimidine-DNA glycosylase	1.58	2.86
	BTTAP_v1_110101	BTCD_v1_0593	coaE	2.7.1.24	dephosphocoenzyme A kinase	1.69	3.05
	BTTAP_v1_110103	BTCD_v1_0595	-		putative helicase DnaB; chromosome replication initiation	1.15	2.01
	BTTAP_v1_110104	BTCD_v1_0596	-		putative primosomal protein DnaI; chromosome replication initiation	1.7	2.77
	BTTAP_v1_120047	BTCD_v1_0443	ppdK	2.7.9.1	pyruvate, phosphate dikinase	0.77	2.17
	BTTAP_v1_120065	BTCD_v1_0462	-	3.2.1.10	putative oligo-1,4-1,6-alpha-glucosidase (sucrase-maltase-isomaltase)	1.22	3.09
	BTTAP_v1_120066	BTCD_v1_0463	mdxR		transcriptional activator of the maltodextrin operon (LacI family)	1.88	2.9
	BTTAP_v1_130059	BTCD_v1_0758	dnaJ		co-factor of molecular chaperone	1.96	2.54
	BTTAP_v1_140011	BTCD_v1_0149	yqgX		putative metal-binding hydrolase	1.81	2.05
	BTTAP_v1_140082	BTCD_v1_0079	clpC		class III stress response-related ATPase, AAA+ superfamily	1.79	2.41
	BTTAP_v1_150042	BTCD_v1_0918	-		conserved protein of unknown function	1.85	2.25
	BTTAP_v1_160035	BTCD_v1_0378	-		exported protein of unknown function	1.59	2.05
	BTTAP_v1_170001	BTCD_v1_1943-1945 (3 fragments)	-		conserved exported protein of unknown function	1,89;2,49;Non-DE	2.49
	BTTAP_v1_180003	BTCD_v1_0336	-	4.4.1.8	putative promiscuous cystathionine beta-lyase / cysteine desulfhydrase	1.56	2.19
	BTTAP_v1_190007	BTCD_v1_0879	-		conserved protein of unknown function	1.89	2.18
	BTTAP_v1_20133	BTCD_v1_1269	mutL		DNA mismatch repair endonuclease	non-DE	2.12
	BTTAP_v1_20201	BTCD_v1_1333	infB		initiation factor IF-2	1.28	2.02
	BTTAP_v1_20219	Absent	-		conserved protein of unknown function	Abs	3.96
	BTTAP_v1_210009	BTCD_v1_0182	-		protein of unknown function	1.76	2.13
	BTTAP_v1_30005	BTCD_v1_2573	lctE	1.1.1.27	L-lactate dehydrogenase	1.89	3.55
	BTTAP_v1_30163	BTCD_v1_2417	-		putative lyase	1.95	2.43
	BTTAP_v1_30169	BTCD_v1_2410	thiM	2.7.1.50	hydroxyethylthiazole kinase	1.33	2.35
	BTTAP_v1_30170	BTCD_v1_2409	thiD	2.7.4.7, 2.7.1.49	phosphomethylpyrimidine kinase, 4-amino-5-hydroxymethyl-2-methylpyrimidine and 4-amino-5-hydroxymethyl-2-methylpyrimidine pyrophosphate kinase	1.47	2.09
	BTTAP_v1_30186	BTCD_v1_2392-2393 (2 fragments)	-		Alanine dehydrogenase/PNT, domain-containing protein	1.25	3.39
	BTTAP_v1_40051	BTCD_v1_2058	addA	3.6.4.12	ATP-dependent deoxyribonuclease (subunit A)	1.08	2.04
	BTTAP_v1_40111	BTCD_v1_2115	yhfP		putative quinone oxidoreductase	1.57	2.37
	BTTAP_v1_50013	BTCD_v1_0861	pepT	3.4.11.4	peptidase T (tripeptidase)	1.29	2.12
	BTTAP_v1_50047	BTCD_v1_0830	yclK		two-component sensor histidine kinase [YclJ]	0.85	2.06
	BTTAP_v1_50077	BTCD_v1_0798	gpsA	1.1.1.94	NAD(P)H-dependent glycerol-3-phosphate dehydrogenase	1.64	2.45
	BTTAP_v1_60008	BTCD_v1_2345	-		putative lyase/dioxygenase	1.86	2.02
	BTTAP_v1_60126	BTCD_v1_2226	-		putative oxidoreductase, NAD-binding domain protein	1.35	2.99
	BTTAP_v1_70018	BTCD_v1_0055	ldhL	1.1.1.27	L-lactate dehydrogenase	1.2	2.41
	BTTAP_v1_70108	BTCD_v1_2602	mtlD	1.1.1.17	mannitol-1-phosphate dehydrogenase	1.41	2.23
	BTTAP_v1_80030	BTCD_v1_1079	alsD	4.1.1.5	alpha-acetolactate decarboxylase	1.38	2.29
	BTTAP_v1_80031	BTCD_v1_1078	alsS	2.2.1.6	alpha-acetolactate synthase	1.24	2.42
	BTTAP_v1_80034	BTCD_v1_1075	lysP		lysine transporter, lysine specific permease	1.46	2.54
	BTTAP_v1_90011	BTCD_v1_0202	atpF	3.6.3.14	ATP synthase (subunit b, component F0)	1.29	2.22
	BTTAP_v1_90013	BTCD_v1_0204	atpA	3.6.3.14	ATP synthase (subunit alpha, component F1)	1.71	2.55
	BTTAP_v1_90014	BTCD_v1_0205	atpG	3.6.3.14	ATP synthase (subunit gamma, component F1)	1.68	2.29
	BTTAP_v1_90015	BTCD_v1_0206	atpD	3.6.3.14	ATP synthase (subunit beta, component F1)	1.6	2.13
	BTTAP_v1_90066	BTCD_v1_0260	uvrA		excinuclease ABC (subunit A)	1.72	2.81
	BTTAP_v1_90070	BTCD_v1_0263	-		putative DNA-binding transcriptional regulator (stress mediated)	Non-DE	2.17
	BTTAP_v1_90076	Absent (68 aa)	-		protein of unknown function	Abs	2.29
	BTTAP_v1_90077	BTCD_v1_0269	trxB	1.8.1.9	thioredoxin reductase	1.39	2.36
	BTTAP_v1_90078	Absent (29 aa)	-		protein of unknown function	Abs	2.58
	BTTAP_v1_90079	BTCD_v1_0270	-		fragment of hypothetical protein (part 1)	1.24	2.83
	BTTAP_v1_90104	BTCD_v1_0291	pgk	2.7.2.3	phosphoglycerate kinase	1.78	2.24
	BTTAP_v1_90107	BTCD_v1_0294	eno	4.2.1.11	enolase	1.84	2.05
	BTTAP_v1_miscRNA17	BTCD_v1_misc_RNA23	-		SAM	1.03	2.09
	BTTAP_v1_miscRNA21	Absent	-		rli28	Abs	2.55
	BTTAP_v1_miscRNA44	Absent	-		Bacteria_large_SRP	Abs	3.11
	BTTAP_v1_miscRNA49	Absent	-		rli28	Abs	2.27
	BTTAP_v1_tRNA20	BTCD_v1_tRNA30	-		Ser tRNA	1.24	2.77
	BTTAP_v1_tRNA21	BTCD_v1_tRNA11;16;54;73;84	-		Asn tRNA	Non-DE	2.59

## Sheet: Feuil1
	Label	Equiv label TAP	Name	EC number	Product	LFG - CD337	LFG - TAP175
	/	BTTAP_v1_miscRNA22	-	#N/A	RatA	/	-3.02
	/	BTTAP_v1_miscRNA80	-	#N/A	yybP-ykoY	/	-3.39
	/	BTTAP_v1_miscRNA81	-	#N/A	L20_leader	/	-2.34
	/	BTTAP_v1_tRNA34	-	#N/A	Phe tRNA	/	-2.21
	/	BTTAP_v1_tRNA58	-	#N/A	Val tRNA	/	-2.95
	/	BTTAP_v1_tRNA59	-	#N/A	Tyr tRNA	/	-2.27
	BTCD_v1_1528 (1529)	BTTAP_v1_10261	-	#N/A	putative transcriptional regulator	/	-2.4
	/	BTTAP_v1_miscRNA14	-	#N/A	PyrR	/	-3
	Absent	BTTAP_v1_100056	-	#N/A	ABC transporter ATP-binding protein	/	-2.51
	Absent	BTTAP_v1_100057	-	#N/A	conserved membrane protein of unknown function	/	-2.78
	Absent	BTTAP_v1_10146	-	#N/A	conserved protein of unknown function	/	-2.25
	Absent	BTTAP_v1_10245	-	#N/A	conserved protein of unknown function	/	-2.23
	Absent	BTTAP_v1_10269	-	#N/A	putative restriction endonuclease BglII	/	-2.23
	absent	BTTAP_v1_10402	-	#N/A	conserved protein of unknown function	/	-3.43
	Absent	BTTAP_v1_200016	-	#N/A	conserved protein of unknown function	/	-2.04
	Absent	BTTAP_v1_200017	immR	#N/A	ICEBs1 mobile element: transcriptional regulator (Xre family)	/	-2.11
	Absent	BTTAP_v1_200018	-	#N/A	conserved protein of unknown function	/	-3.03
	Absent	BTTAP_v1_200019	-	#N/A	conserved protein of unknown function	/	-2.51
	Absent	BTTAP_v1_20135	-	#N/A	conserved protein of unknown function	/	-2.64
	Absent	BTTAP_v1_20141	-	#N/A	DNA helicase	/	-2.18
	Absent	BTTAP_v1_20143	-	#N/A	protein of unknown function	/	-2.2
	Absent	BTTAP_v1_20159	-	#N/A	DNA-binding protein	/	-2.31
	Absent	BTTAP_v1_230003	-	#N/A	conserved protein of unknown function	/	-2.39
	Absent	BTTAP_v1_230005	-	#N/A	conserved protein of unknown function	/	-2.1
	Absent	BTTAP_v1_230006	-	#N/A	conserved protein of unknown function	/	-3.77
	Absent	BTTAP_v1_230007	-	#N/A	conserved exported protein of unknown function	/	-2.13
	Absent	BTTAP_v1_30088	-	#N/A	conserved protein of unknown function	/	-3.76
	Absent	BTTAP_v1_40092	-	#N/A	conserved protein of unknown function	/	-2.65
	Absent	BTTAP_v1_miscRNA13	-	#N/A	PyrR	/	-2.57
	Absent	BTTAP_v1_120033	-	#N/A	conserved protein of unknown function Reannoté putative response regulator of the LytR/AlgR family	/	-2.41
	Absent	BTTAP_v1_120034	-	#N/A	conserved membrane protein of unknown function	/	-2.06
	Absent	BTTAP_v1_120035	-	#N/A	conserved membrane protein of unknown function	/	-2.32
	Absent	BTTAP_v1_30084	coaC	#N/A	putative phosphopantothenoylcysteine decarboxylase	/	-2.14
	Absent (54 aa)	BTTAP_v1_30030	-	#N/A	protein of unknown function	/	-2.11
	Absent (69 aa)	BTTAP_v1_160010	-	#N/A	conserved protein of unknown function	/	-2.08
	Absent (frgt BTCD_V1_1338)	BTTAP_v1_20206	-	#N/A	conserved protein of unknown function	/	-2.02
	BTCD_v1_0004	BTTAP_v1_70071	-	#N/A	exported protein of unknown function	/	-2.09
	BTCD_v1_0023	BTTAP_v1_70050	guaC	1.7.1.7	GMP reductase (NADP-dependent)	-2.21	-3.61
	BTCD_v1_0159	BTTAP_v1_140002	-		putative biotin transporter BioY	-3.89	-2.7
	BTCD_v1_0177	BTTAP_v1_210004	-		conserved protein of unknown function	-2.24	-3.41
	BTCD_v1_0178	BTTAP_v1_210005	-	#N/A	conserved protein of unknown function	/	-2.32
	BTCD_v1_0287	BTTAP_v1_90100	-		conserved membrane protein of unknown function	-2.08	-2.83
	BTCD_v1_0288	BTTAP_v1_90101	-	#N/A	protein of unknown function	/	-2.08
	BTCD_v1_0373	BTTAP_v1_160030	-		putative D-Ala-teichoic acid biosynthesis protein	-2.6	-3.63
	BTCD_v1_0455	BTTAP_v1_120059 (maxLrap 0,34)	-		putative maltodextrin import ATP-binding protein MsmX	-2.11	/
	BTCD_v1_0509	BTTAP_v1_110019	-	#N/A	protein of unknown function	/	-2.72
	BTCD_v1_0511	BTTAP_v1_110021	fruK	2.7.1.56	fructose-1-phosphate kinase	-2.62	/
	BTCD_v1_0512	BTTAP_v1_110022	fruA	2.7.1.69/2.7.1.202	phosphotransferase system (PTS) fructose-specific enzyme IIABC component	-2.92	-2.09
	BTCD_v1_0523	BTTAP_v1_110033	-		putative transcriptional regulator of the potABCD operon	-2.59	-3.09
	BTCD_v1_0524	BTTAP_v1_110034	potA		Spermidine/putrescine import ATP-binding protein PotA	-2.5	-2.69
	BTCD_v1_0525	BTTAP_v1_110035	potB		Spermidine/putrescine transport system permease protein PotB	-2.84	-3.16
	BTCD_v1_0526	BTTAP_v1_110036	potC		spermidine/putrescine transport system permease protein PotC	-3.07	-3.15
	BTCD_v1_0527	BTTAP_v1_110037	potD		spermidine/putrescine-binding periplasmic protein	-2.72	-3
	BTCD_v1_0550	BTTAP_v1_110060	-	#N/A	putative glutamine amidotransferase	/	-2.87
	BTCD_v1_0552	absent (46aa)	-		protein of unknown function	-2.17	/
	BTCD_v1_0571	BTTAP_v1_110080	-	#N/A	conserved protein of unknown function	/	-3.16
	BTCD_v1_0574	BTTAP_v1_110083	-	#N/A	putative Acetyltransferase	/	-2.55
	BTCD_v1_0575	BTTAP_v1_110084	-	#N/A	protein of unknown function	/	-2.38
	BTCD_v1_0608	BTTAP_v1_130012	-		putative ABC-type transport system, permease component	-3.81	-2.33
	BTCD_v1_0609	BTTAP_v1_130013	-		putative ABC-type transport system, ATPase component	-3.67	/
	BTCD_v1_0618	BTTAP_v1_130022	ykuJ	#N/A	putative RNA-specific modification enzyme	/	-2.32
	BTCD_v1_0619	BTTAP_v1_130023	ykuL	#N/A	putative RNA-binding protein	/	-2.17
	BTCD_v1_0632	BTTAP_v1_130036	purB	4.3.2.2	adenylosuccinate lyase	-2.12	-2.48
	BTCD_v1_0633	BTTAP_v1_130037	purC	6.3.2.6	phosphoribosylaminoimidazole succinocarboxamide synthetase	-3.9	-5.13
	BTCD_v1_0634	BTTAP_v1_130038	purS		factor required for phosphoribosylformylglycinamidine synthetase activity	-3.77	-5.27
	BTCD_v1_0635	BTTAP_v1_130039	purQ	6.3.5.3	phosphoribosylformylglycinamidine synthetase I	-3.5	-4.54
	BTCD_v1_0636	BTTAP_v1_130040	purL	6.3.2.6	phosphoribosylformylglycinamidine synthetase II	-2.88	-3.53
	BTCD_v1_0637	BTTAP_v1_130041	purF	2.4.2.14	glutamine phosphoribosylpyrophosphate amidotransferase	-2.15	-2.6
	BTCD_v1_0638	BTTAP_v1_130042	purM	#N/A	phosphoribosylaminoimidazole synthetase	/	-2.19
	BTCD_v1_0639	BTTAP_v1_130043	purN	#N/A	phosphoribosylglycinamide formyltransferase	/	-2.22
	BTCD_v1_0653	BTTAP_v1_50114	yhfS	2.3.1.9	putative acetyl-CoA C-acetyltransferase	-2.24	/
	BTCD_v1_0676	Absent	-		putative polysaccharide biosynthesis protein	-2.03	/
	BTCD_v1_0685	BTTAP_v1_50123	msrC	#N/A	free methionine-(R)-sulfoxide reductase	/	-2.35
	BTCD_v1_0718	BTTAP_v1_50156	-		putative Guanine/hypoxanthine permease PbuO	-2	/
	BTCD_v1_0719	BTTAP_v1_50157	-	#N/A	putative integral membrane protein possibly involved in chromosome condensation	/	-2.01
	BTCD_v1_0730	BTTAP_v1_50168	yqjM	1.6.99.1	NADPH-dependent flavin oxidoreductase	-2.08	/
	BTCD_v1_0732	BTTAP_v1_50170	-	#N/A	conserved protein of unknown function	/	-2.03
	BTCD_v1_0824	BTTAP_v1_50053	-	#N/A	exported protein of unknown function	/	-4.08
	BTCD_v1_0858	BTTAP_v1_50016	rpsT	#N/A	30S ribosomal protein S20	/	-2.03
	BTCD_v1_0863	BTTAP_v1_50011	-	#N/A	putative signal peptidase I (sipA)	/	-2.04
	BTCD_v1_1012	BTTAP_v1_80098	-		membrane protein of unknown function	-3.44	-4.04
	BTCD_v1_1019	BTTAP_v1_80092	-	#N/A	protein of unknown function	/	-2.24
	BTCD_v1_1022	BTTAP_v1_80089	-	2.7.1.194	putative PTS system, IIB subunit	-2.19	/
	BTCD_v1_1023	BTTAP_v1_80088	-	2.7.1.194	putative phosphotransferase transport system, IIC component	-2.31	/
	BTCD_v1_1052	BTTAP_v1_80058	-		putative oligopeptide ABC transporter, periplasmic oligopeptide-binding, AppA	-2.3	-2.38
	BTCD_v1_1061	BTTAP_v1_80048	yrdN	5.3.2.-	putative tautomerase	-2.94	-2.98
	BTCD_v1_1062	BTTAP_v1_80047	iolR		transcriptional regulator (DeoR family)	-2.33	-2.39
	BTCD_v1_1063	BTTAP_v1_80046	iolA	1.2.1.27, 1.2.1.18	methylmalonate-semialdehyde dehydrogenase	-2.01	/
	BTCD_v1_1064	BTTAP_v1_80045	iolB	5.3.1.30	5-deoxy-D-glucuronic acid isomerase	-3.62	/
	BTCD_v1_1065	BTTAP_v1_80044	iolC	2.7.1.92	2-deoxy-5-keto-D-gluconic acid kinase	-4.34	-2.4
	BTCD_v1_1066	BTTAP_v1_80043	iolD	3.7.1.22	3D-(3,5/4)-trihydroxycyclohexane-1,2-dione hydrolase	-4.68	-2.79
	BTCD_v1_1067	BTTAP_v1_80042	iolE	4.2.1.44	2-keto-myo-inositol dehydratase	-5.17	-3.84
	BTCD_v1_1068	BTTAP_v1_80041	iolT		myo-inositol transporter	-4.92	-4
	BTCD_v1_1069	BTTAP_v1_80040	iolG	1.1.1.18	myo-inositol 2-dehydrogenase/D-chiro-inositol 3-dehydrogenase	-5.34	-3.89
	BTCD_v1_1070	BTTAP_v1_80039	iolH	5.3.-.-	sugar-phosphate epimerase/isomerase	-5.26	-4.31
	BTCD_v1_1071	BTTAP_v1_80038	iolI	5.3.99.11	inosose isomerase	-5.1	-4.37
	BTCD_v1_1072	BTTAP_v1_80037	iolJ	4.1.2.29	2-deoxy-5-keto-D-gluconic acid 6-phosphate aldolase	-4.23	-3.72
	BTCD_v1_1104	BTTAP_v1_80003	-	#N/A	conserved protein of unknown function	/	-3.02
	BTCD_v1_1107	BTTAP_v1_20171	-	#N/A	conserved protein of unknown function	/	-3.33
	BTCD_v1_1125	BTTAP_v1_20024	lspA	#N/A	signal peptidase II	/	-2.54
	BTCD_v1_1127	BTTAP_v1_20026	pyrR	2.4.2.9	Bifunctional protein PyrR: transcriptional attenuator and uracil phosphoribosyltransferase activity	-2.11	-3.03
	BTCD_v1_1128	BTTAP_v1_20027	pyrP		uracil permease	-2.12	-2.56
	BTCD_v1_1143	BTTAP_v1_20041 (68aa)	-		Protein of unknown function	-3.39	-5
	BTCD_v1_1155	BTTAP_v1_20052	rpoZ	#N/A	omega subunit of RNA polymerase	/	-2.17
	BTCD_v1_1173	BTTAP_v1_20063	yqhY	#N/A	putative alkaline shock protein	/	-2.15
	BTCD_v1_1180	BTTAP_v1_20070	acpA	#N/A	acyl carrier protein	/	-2.24
	BTCD_v1_1203	BTTAP_v1_20172	-	#N/A	conserved exported protein of unknown function	/	-2.6
	BTCD_v1_1209	BTTAP_v1_20087	rpsP		ribosomal protein S16 (BS17)	-2.31	-2.37
	BTCD_v1_1210	BTTAP_v1_20088	ylqD	#N/A	conserved hypothetical protein	/	-2.02
	BTCD_v1_1215	Absent (291aa)	-		conserved protein of unknown function	-2.12	/
	BTCD_v1_1216	Absent (245aa)	-		conserved protein of unknown function	-2.35	/
	BTCD_v1_1245	BTTAP_v1_20109	sipS	#N/A	type I signal peptidase	/	-2.07
	BTCD_v1_1263	BTTAP_v1_20126	-	#N/A	protein of unknown function	/	-2.43
	BTCD_v1_1279	BTTAP_v1_20151	-	#N/A	putative ABC transporter, ATP binding protein	/	-2.44
	BTCD_v1_1292	BTTAP_v1_20156 (52aa)	-		protein of unknown function	-2.97	-3.07
	BTCD_v1_1427	Absent (25aa)	-		protein of unknown function	-2.83	/
	BTCD_v1_1428	BTTAP_v1_10357	eutQ	factor	Ethanolamine utilization protein EutQ	-2.24	-2.41
	BTCD_v1_1429	BTTAP_v1_10356	eutH	transport	putative ethanolamine permease, EutH	-2.32	-2.25
	BTCD_v1_1430	BTTAP_v1_10355	eutN	metabolosome	putative ethanolamine utilization protein EutN	-2.32	-2.44
	BTCD_v1_1432	BTTAP_v1_10353	eutD	2.3.1.8	putative phosphotransacetylase EutD, similar to pduL	-2.36	-2.56
	BTCD_v1_1433	BTTAP_v1_10352	eutM	metabolosmoe	Ethanolamine carboxysome structural protein, BMC family	-3.22	-2.51
	BTCD_v1_1434	BTTAP_v1_10351	eutE	1.2.1.10	Ethanolamine acetaldehyde oxydoreductase	-2.6	/
	BTCD_v1_1435	BTTAP_v1_10350	eutK	metabolosome	putative ethanolamine utilization protein EutK	-2.5	/
	BTCD_v1_1436	BTTAP_v1_10349	eutL	metabolosome	Ethanolamine carboxysome structural protein, BMC family	-2.08	/
	BTCD_v1_1437	BTTAP_v1_10348	eutC	4.3.1.7	Ethanolamine ammonia lyase small subunit	-2.22	/
	BTCD_v1_1458	BTTAP_v1_10327	-	#N/A	putative integral inner membrane component, YesV	/	-2.22
	BTCD_v1_1459	BTTAP_v1_10326	-	#N/A	conserved exported protein of unknown function	/	-2.56
	BTCD_v1_1460	BTTAP_v1_10325	ytcP	#N/A	putative ABC transporter (permease)	/	-3.2
	BTCD_v1_1461	BTTAP_v1_10324	-	#N/A	putative ABC transporter permease protein YesP	/	-3.85
	BTCD_v1_1507	BTTAP_v1_10282	-	#N/A	membrane protein of unknown function	/	-2.37
	BTCD_v1_1508	BTTAP_v1_10281	pftA		pyruvate uptake system subunit A	-5.19	-5.51
	BTCD_v1_1509	BTTAP_v1_10280	pftB		pyruvate import system subunit B	-4.12	-4.04
	BTCD_v1_1612	BTTAP_v1_10178	trpA	4.2.1.20	Tryptophan synthase alpha chain	-3.57	/
	BTCD_v1_1613	BTTAP_v1_10177	trpB	4.2.1.20	tryptophan synthase (beta subunit)	-3.3	/
	BTCD_v1_1614	BTTAP_v1_10176	trpF	5.3.1.24	N-(5'-phosphoribosyl)anthranilate isomerase	-3.28	/
	BTCD_v1_1615	BTTAP_v1_10175	trpC	4.1.1.48	Indole-3-glycerol phosphate synthase	-3.38	/
	BTCD_v1_1616	BTTAP_v1_10174	trpGD	2.4.2.18, 4.1.3.27	Bifunctional protein TrpGD [Includes: Anthranilate synthase component 2 ; Anthranilate phosphoribosyltransferase]	-3.48	/
	BTCD_v1_1617	BTTAP_v1_10173	trpE	4.1.3.27	Anthranilate synthase component 1	-3.21	/
	BTCD_v1_1669	BTTAP_v1_10119	-	#N/A	putative permease	/	-3.59
	BTCD_v1_1670	BTTAP_v1_10118	-	#N/A	protein of unknown function	/	-2.6
	BTCD_v1_1723	BTTAP_v1_10066	-	#N/A	protein of unknown function	/	-2.42
	BTCD_v1_1735	BTTAP_v1_10054 (45aa)	-		protein of unknown function	-2.06	/
	BTCD_v1_1747	BTTAP_v1_10039	-	#N/A	protein of unknown function	/	-2.77
	BTCD_v1_1750	BTTAP_v1_10036	rpmGA		ribosomal protein L33	-2.14	-2.93
	BTCD_v1_1780	BTTAP_v1_10008	yrbF	#N/A	component of the preprotein translocase	/	-2.32
	BTCD_v1_1781	BTTAP_v1_10007	-	#N/A	protein of unknown function	/	-2.42
	BTCD_v1_1818	BTTAP_v1_100031	-	#N/A	conserved membrane protein of unknown function	/	-2.42
	BTCD_v1_1840	BTTAP_v1_100055	-	#N/A	conserved protein of unknown function	/	-2.46
	BTCD_v1_1904	BTTAP_v1_100066	-	#N/A	Putative oligopeptide ABC transporter, periplasmic oligopeptide-binding protein, oppA	/	-2.26
	BTCD_v1_1946	BTTAP_v1_170002	-	#N/A	Membrane protein of unknown function	/	-2.13
	BTCD_v1_1997	BTTAP_v1_170027	-	#N/A	protein of unknown function	/	-2.86
	BTCD_v1_2011	BTTAP_v1_40008	-		protein of unknown function	-2.09	/
	BTCD_v1_2014	BTTAP_v1_40009	-	#N/A	conserved protein of unknown function	/	-2.08
	BTCD_v1_2028	BTTAP_v1_40023	spxA		redox-sensitive regulator	-4.62	/
	BTCD_v1_2032	BTTAP_v1_40026	-	#N/A	protein of unknown function	/	-2.38
	BTCD_v1_2045	BTTAP_v1_40039	-		conserved membrane protein of unknown function	-2.08	-2.24
	BTCD_v1_2077	BTTAP_v1_40070	-	#N/A	protein of unknown function	/	-2.54
	BTCD_v1_2081	BTTAP_v1_40074	ykaA	#N/A	putative PitB transporter accessory protein	/	-2.25
	BTCD_v1_2118	BTTAP_v1_40114	-	#N/A	putative transcriptional regulator (Lrp/AsnC family)	/	-2.2
	BTCD_v1_2139	BTTAP_v1_40132	-	#N/A	conserved protein of unknown function	/	-2.12
	BTCD_v1_2153	BTTAP_v1_40145	-	#N/A	exported protein of unknown function	/	-2.29
	BTCD_v1_2215	BTTAP_v1_60137	-		putative permease of the major facilitator superfamily	-2.17	/
	BTCD_v1_2225	BTTAP_v1_60127	cutR		putative HTH-type transcriptional repressor YcnK	-2.04	-2.05
	BTCD_v1_2228	BTTAP_v1_60124	cspC	#N/A	cold-shock protein	/	-2.08
	BTCD_v1_2241	BTTAP_v1_60110	-		protein of unknown function	-3.51	-2.46
	BTCD_v1_2243	BTTAP_v1_60108	pbuG	#N/A	hypoxanthine/guanine permease	/	-3.33
	BTCD_v1_2248	BTTAP_v1_60103	-		conserved membrane protein of unknown function	-2.31	-2.38
	BTCD_v1_2262	BTTAP_v1_60092	-	#N/A	putative lipoprotein NlpA family	/	-2.13
	BTCD_v1_2278	BTTAP_v1_60076	-	#N/A	putative oligopeptide ABC transporter, oligopeptide-binding protein, OppA	/	-2.71
	BTCD_v1_2310	BTTAP_v1_60044	-		putative ABC transporter permease	-3.19	-2.89
	BTCD_v1_2311	BTTAP_v1_60043	yxdL		ABC transporter (ATP-binding protein); efflux of cationic peptides; bacitracin ABC efflux transporter	-3.06	-2.66
	BTCD_v1_2338	BTTAP_v1_60015	xapB		xanthosine transporter	-3	-2.22
	BTCD_v1_2339	BTTAP_v1_60014	pupG	2.4.2.1	purine nucleoside phosphorylase	-2.74	-2.32
	BTCD_v1_2373	BTTAP_v1_30205	bglP	#N/A	beta-glucoside-specific PTS enzyme IIABC component	/	-2.9
	BTCD_v1_2375	BTTAP_v1_30203	pbuX	#N/A	xanthine permease	/	-2.24
	BTCD_v1_2384	BTTAP_v1_30194	-		putative transcriptional regulator containing CheY-like receiver domain and AraC-type DNA-binding domain	-3.01	-2.02
	BTCD_v1_2385	BTTAP_v1_30193	-		putative signal transduction histidine kinase	-3.52	/
	BTCD_v1_2386	BTTAP_v1_30192	-		putative ABC-type Fe3+ transport system, permease component	-6.78	-4.48
	BTCD_v1_2387	BTTAP_v1_30191	-	3.6.3.-	putative ABC-type Fe3+ transport system, ATP-binding protein	-5.62	-3.32
	BTCD_v1_2388	BTTAP_v1_30190	-		putative ABC-type Fe3+ transport system, periplasmic component	-5.39	-3.56
	BTCD_v1_2389	BTTAP_v1_30189	nhaC		Na(+)/H(+) antiporter NhaC	-2.33	-2.14
	BTCD_v1_2396	BTTAP_v1_30182	ascR		transcriptional regulator of operon snaA-ytnM degrading cysteine-containing compounds (LysR family)	-3.44	-5.11
	BTCD_v1_2397	BTTAP_v1_30181	-	1.5.1.29	putative FMN reductase NADPH-dependent	-3.16	-2.65
	BTCD_v1_2398	BTTAP_v1_30180	snaA		N-acetyltransferase acting on sulfur compounds	-2.88	-2.41
	BTCD_v1_2399	BTTAP_v1_30179	tcyJ		sulfur containing amino acid ABC transporter binding lipoprotein	-4.01	-2.3
	BTCD_v1_2400	BTTAP_v1_30178	tcyK		sulfur-containing amino acid ABC transporter binding lipoprotein	-2.11	/
	BTCD_v1_2401	BTTAP_v1_30177	tcyL		sulfur-containing amino acid ABC transporter (permease)	-2.21	-2.35
	BTCD_v1_2402	BTTAP_v1_30176	tcyM		sulfur-containing amino acid ABC transporter (permease)	-2.43	-2.07
	BTCD_v1_2503	BTTAP_v1_30064	-	#N/A	putative CDP-glycerol glycerophosphotransferase	/	-2.48
	BTCD_v1_2549	BTTAP_v1_30021	-		putative ECF transporter, substrate-specific component	-2.15	-2.94
	BTCD_v1_2553	BTTAP_v1_30017	-		membrane protein of unknown function	-2.14	/
	BTCD_v1_2633	BTTAP_v1_70077	rnpA	#N/A	component RNase P, protein C5 substrate specificity	/	-2.74
	BTCD_v1_misc_RNA_15	Absent	-		L19_leader	-2.33	/
	BTCD_v1_tRNA4	/	-		Thr tRNA	-2.47	/
		BTTAP_v1_tRNA61	-		Lys tRNA	/	-2.05
	BTCD_v1_0595	BTTAP_v1_110103	-	#N/A	putative helicase DnaB; chromosome replication initiation and membrane attachment protein	#N/A	2.01
	/	BTTAP_v1_miscRNA17	-	#N/A	SAM	/	2.09
	/	BTTAP_v1_miscRNA21	-	#N/A	rli28	/	2.55
	/	BTTAP_v1_miscRNA44	-	#N/A	Bacteria_large_SRP	/	3.11
	/	BTTAP_v1_miscRNA49	-	#N/A	rli28	/	2.27
	/	BTTAP_v1_tRNA20	-	#N/A	Ser tRNA	/	2.77
	/	BTTAP_v1_tRNA21	-	#N/A	Asn tRNA	/	2.59
	Absent	BTTAP_v1_100103	-	#N/A	conserved protein of unknown function	/	3.73
	Absent	BTTAP_v1_10143	-	#N/A	conserved protein of unknown function	/	2.31
	Absent	BTTAP_v1_110001	-	#N/A	conserved protein of unknown function	/	2
	Absent (29 aa)	BTTAP_v1_90078	-	#N/A	protein of unknown function	/	2.58
	Absent (59 aa)	BTTAP_v1_100102	-	#N/A	protein of unknown function	/	3.85
	Absent (68 aa)	BTTAP_v1_90076	-	#N/A	protein of unknown function	/	2.29
	Absent (frgt BTCD_V1_1343)	BTTAP_v1_20219	-	#N/A	conserved protein of unknown function	/	3.96
	BTCD_v1_0055	BTTAP_v1_70018	ldhL	#N/A	L-lactate dehydrogenase	#N/A	2.41
	BTCD_v1_0057	BTTAP_v1_70016	-		putative cation efflux protein	2.28	#N/A
	BTCD_v1_0079	BTTAP_v1_140082	clpC	#N/A	class III stress response-related ATPase, AAA+ superfamily	#N/A	2.41
	BTCD_v1_0149	BTTAP_v1_140011	yqgX	#N/A	putative metal-binding hydrolase	#N/A	2.05
	BTCD_v1_0182	BTTAP_v1_210009	-	#N/A	protein of unknown function	#N/A	2.13
	BTCD_v1_0202	BTTAP_v1_90011	atpF	#N/A	ATP synthase (subunit b, component F0)	#N/A	2.22
	BTCD_v1_0204	BTTAP_v1_90013	atpA	#N/A	ATP synthase (subunit alpha, component F1)	#N/A	2.55
	BTCD_v1_0205	BTTAP_v1_90014	atpG	#N/A	ATP synthase (subunit gamma, component F1)	#N/A	2.29
	BTCD_v1_0206	BTTAP_v1_90015	atpD	#N/A	ATP synthase (subunit beta, component F1)	#N/A	2.13
	BTCD_v1_0235	BTTAP_v1_90041	-		putative ComF operon protein A, helicase competence protein	2.01	2.51
	BTCD_v1_0237	BTTAP_v1_90043	hpf		ribosome-associated sigma 54 modulation protein; ribosome dimerisation factor	2.46	#N/A
	BTCD_v1_0260	BTTAP_v1_90066	uvrA	#N/A	excinuclease ABC (subunit A)	#N/A	2.81
	BTCD_v1_0263	BTTAP_v1_90070	-	#N/A	putative DNA-binding transcriptional regulator (stress mediated)	#N/A	2.17
	BTCD_v1_0265	BTTAP_v1_90072	hprK		serine/threonine protein kinase/phosphorylase	2.02	#N/A
	BTCD_v1_0267	BTTAP_v1_90074	gabD	1.2.1.24	succinate-semialdehyde dehydrogenase	3.18	4.71
	BTCD_v1_0268	BTTAP_v1_90075	-		protein of unknown function	2.48	3.74
	BTCD_v1_0269	BTTAP_v1_90077	trxB	#N/A	thioredoxin reductase	#N/A	2.36
	BTCD_v1_0270 (homologie)	BTTAP_v1_90079	-	#N/A	fragment of hypothetical protein (part 1)	#N/A	2.83
	BTCD_v1_0289	BTTAP_v1_90102	cggR		transcriptional regulator of gapA (central glycolytic genes regulator)	2.11	#N/A
	BTCD_v1_0291	BTTAP_v1_90104	pgk	#N/A	phosphoglycerate kinase	#N/A	2.24
	BTCD_v1_0292	BTTAP_v1_90105	tpiA	5.3.1.1	triose phosphate isomerase	2.05	2.53
	BTCD_v1_0293	BTTAP_v1_90106	pgm	5.4.2.12	phosphoglycerate mutase	2.14	2.67
	BTCD_v1_0294	BTTAP_v1_90107	eno	#N/A	enolase	#N/A	2.05
	BTCD_v1_0295	BTTAP_v1_90109	-		protein of unknown function	2.13	#N/A
	BTCD_v1_0336	BTTAP_v1_180003	-	#N/A	putative promiscuous cystathionine beta-lyase / cysteine desulfhydrase	#N/A	2.19
	BTCD_v1_0345	BTTAP_v1_300001	-		protein of unknown function	2.3	2.81
	BTCD_v1_0346	absent	-		protein of unknown function	2.12	/
	BTCD_v1_0378	BTTAP_v1_160035	-	#N/A	exported protein of unknown function	#N/A	2.05
	BTCD_v1_0398	BTTAP_v1_120013	copZ		copper insertion chaperone and transporter component	2.57	3.27
	BTCD_v1_0399	BTTAP_v1_120014	copA		copper transporter ATPase	4.32	6.24
	BTCD_v1_0400	BTTAP_v1_120015	-		conserved protein of unknown function	3.24	3.24
	BTCD_v1_0435	BTTAP_v1_120037	-		protein of unknown function	2.28	#N/A
	BTCD_v1_0443	BTTAP_v1_120047	ppdK	#N/A	Pyruvate, phosphate dikinase	#N/A	2.17
	BTCD_v1_0462	BTTAP_v1_120065	-	#N/A	putative oligo-1,4-1,6-alpha-glucosidase (sucrase-maltase-isomaltase)	#N/A	3.09
	BTCD_v1_0463	BTTAP_v1_120066	mdxR	#N/A	transcriptional activator of the maltodextrin operon (LacI family)	#N/A	2.9
	BTCD_v1_0519	BTTAP_v1_110029	lutC	#N/A	Lactate utilization protein C	#N/A	2.2
	BTCD_v1_0529	BTTAP_v1_110039	-	#N/A	putative esterase/lipase	#N/A	2.38
	BTCD_v1_0531	BTTAP_v1_110041	-		protein of unknown function	3.3	3.64
	BTCD_v1_0534	BTTAP_v1_110044	katA	#N/A	vegetative catalase 1	#N/A	2.34
	BTCD_v1_0591	BTTAP_v1_110099	polA	#N/A	DNA polymerase I	#N/A	2.41
	BTCD_v1_0592	BTTAP_v1_110100	mutM	#N/A	formamidopyrimidine-DNA glycosylase	#N/A	2.86
	BTCD_v1_0593	BTTAP_v1_110101	coaE	#N/A	dephosphocoenzyme A kinase	#N/A	3.05
	BTCD_v1_0596	BTTAP_v1_110104	-	#N/A	putative primosomal protein DnaI; chromosomal replication initiator protein	#N/A	2.77
	BTCD_v1_0607	BTTAP_v1_130011	-		conserved protein of unknown function	2.02	#N/A
	BTCD_v1_0723	BTTAP_v1_50161	-	1.6.5.5	putative Zn-dependent oxidoreductase	2.51	2.79
	BTCD_v1_0726	BTTAP_v1_50164	groES		chaperonin small subunit	2.01	#N/A
	BTCD_v1_0727	BTTAP_v1_50165	groEL		chaperonin large subunit	2.74	2.8
	BTCD_v1_0753	BTTAP_v1_130064	-		conserved protein of unknown function	4.04	3.83
	BTCD_v1_0755	BTTAP_v1_130062	hrcA		transcriptional regulator of heat-shock genes	2.53	2.29
	BTCD_v1_0756	BTTAP_v1_130061	grpE		nucleotide exchange factor for DnaK activity	2.26	2.32
	BTCD_v1_0757	BTTAP_v1_130060	dnaK		molecular chaperone, ATP-dependent	2.43	2.68
	BTCD_v1_0758	BTTAP_v1_130059	dnaJ	#N/A	co-factor of molecular chaperone	#N/A	2.54
	BTCD_v1_0798	BTTAP_v1_50077	gpsA	#N/A	NAD(P)H-dependent glycerol-3-phosphate dehydrogenase	#N/A	2.45
	BTCD_v1_0799	BTTAP_v1_50076	hbs		non-specific DNA-binding protein HBsu	2.32	#N/A
	BTCD_v1_0830	BTTAP_v1_50047	yclK	#N/A	two-component sensor histidine kinase [YclJ]	#N/A	2.06
	BTCD_v1_0851	BTTAP_v1_50024	comEA		membrane bound high-affinity DNA-binding receptor	2.34	3.35
	BTCD_v1_0861	BTTAP_v1_50013	pepT	#N/A	peptidase T (tripeptidase)	#N/A	2.12
	BTCD_v1_0869	BTTAP_v1_50005	-		protein of unknown function	2.21	2.23
	BTCD_v1_0879	BTTAP_v1_190007	-	#N/A	conserved protein of unknown function	#N/A	2.18
	BTCD_v1_0891	BTTAP_v1_190018	-		putative nucleotide- or NAD- binding protein (epimerase family protein YfhF)	2.87	3.61
	BTCD_v1_0918	BTTAP_v1_150042	-	#N/A	conserved protein of unknown function	#N/A	2.25
	BTCD_v1_0957	absent (87aa)	-		protein of unknown function	2.32	/
	BTCD_v1_0975	BTTAP_v1_80128	-		putative thioredoxin/glutaredoxin-like protein	2.2	#N/A
	BTCD_v1_1031	BTTAP_v1_80080	garK	2.7.1.165	Glycerate 2-kinase	2.12	2.36
	BTCD_v1_1042	BTTAP_v1_80069	-	1.2.1.76	putative succinate-semialdehyde dehydrogenase (acetylating)	4.28	3
	BTCD_v1_1043	BTTAP_v1_80068	-		Uncharacterized conserved protein	2.94	#N/A
	BTCD_v1_1058	BTTAP_v1_80051	nagA	3.5.1.25	N-acetylglucosamine-6-phosphate deacetylase	2.21	2.47
	BTCD_v1_1059	BTTAP_v1_80050	nagB	3.5.99.6	N-acetylglucosamine-6-phosphate isomerase	2.15	#N/A
	BTCD_v1_1075	BTTAP_v1_80034	lysP	#N/A	lysine transporter, lysine specific permease	#N/A	2.54
	BTCD_v1_1077	BTTAP_v1_80032	-		conserved protein of unknown function	2.1	2.86
	BTCD_v1_1078	BTTAP_v1_80031	alsS	#N/A	alpha-acetolactate synthase	#N/A	2.42
	BTCD_v1_1079	BTTAP_v1_80030	alsD	#N/A	alpha-acetolactate decarboxylase	#N/A	2.29
	BTCD_v1_1133	BTTAP_v1_20032	pyrK	1.3.98.1	dihydroorotate dehydrogenase (electron transfer subunit)	2.46	2.54
	BTCD_v1_1134	BTTAP_v1_20033	pyrD	1.3.1.14	dihydroorotate dehydrogenase (catalytic subunit)	2.76	2.87
	BTCD_v1_1135	BTTAP_v1_20034	pyrF	4.1.1.23	orotidine 5'-phosphate decarboxylase	2.92	3.04
	BTCD_v1_1136	BTTAP_v1_20035	pyrE	2.4.2.10	orotate phosphoribosyltransferase	3.35	3.48
	BTCD_v1_1269	BTTAP_v1_20133	mutL	#N/A	DNA mismatch repair endonuclease	#N/A	2.12
	BTCD_v1_1296	BTTAP_v1_20161	pdxT	3.5.1.2, 4.3.3.6	glutamine amidotransferase subunit PdxT	3.86	5.32
	BTCD_v1_1297	BTTAP_v1_20162	pdxS	4.3.3.6	glutamine amidotransferase , pdxS synthase subunit	3.53	4.65
	BTCD_v1_1300	BTTAP_v1_20165	-	3.1.1.-	putative Esterase/lipase	2.09	2.03
	BTCD_v1_1326	BTTAP_v1_20192	-		putative acetyltransferase	3.51	3.13
	BTCD_v1_1333	BTTAP_v1_20201	infB	#N/A	initiation factor IF-2	#N/A	2.02
	BTCD_v1_1339	BTTAP_v1_20207	-		Stress response regulator gls24 homolog	2.12	2.54
	BTCD_v1_1343	BTTAP_v1_20219 (54aa) maxLrap=0,32	-		protein of unknown function	2.89	#N/A
	BTCD_v1_1344	BTTAP_v1_20220	vmlR		ATP-binding cassette efflux transporter	2.91	4.27
	BTCD_v1_1410	BTTAP_v1_10372	hisIE	3.5.4.19, 3.6.1.31	phosphoribosyl-AMP cyclohydrolase	2.41	3.76
	BTCD_v1_1411	BTTAP_v1_10371	hisF	2.4.2.-	imidazole glycerol phosphate synthase subunit	2.3	4.68
	BTCD_v1_1412	BTTAP_v1_10370	hisA	5.3.1.16	phosphoribosylformimino-5-aminoimidazole carboxamide ribotide isomerase	2.51	5.2
	BTCD_v1_1413	BTTAP_v1_10369	hisH	transport	imidazole glycerol phosphate synthase, glutamine amidotransferase subunit	2.44	4.58
	BTCD_v1_1414	BTTAP_v1_10368	hisB	4.2.1.19	imidazoleglycerol-phosphate dehydratase [Mn(II)-dependent]	2.5	4.07
	BTCD_v1_1415	BTTAP_v1_10367	hisD	1.1.1.23	histidinol dehydrogenase	2.67	4.57
	BTCD_v1_1416	BTTAP_v1_10366	hisG	2.4.2.17	ATP phosphoribosyltransferase	2.46	3.61
	BTCD_v1_1417	BTTAP_v1_10365	hisZ	2.4.2.17	ATP phosphoribosyltransferase regulatory subunit	2.27	2.36
	BTCD_v1_1420	BTTAP_v1_10362 (71aa)	-		conserved protein of unknown function	2.4	#N/A
	BTCD_v1_1443	BTTAP_v1_10341	eutG	#N/A	Ethanolamine iron-dependent Alcohol dehydrogenase	#N/A	2
	BTCD_v1_1482	BTTAP_v1_10305	-	#N/A	conserved protein of unknown function	#N/A	2.24
	BTCD_v1_1483	BTTAP_v1_10304	-		conserved protein of unknown function	2.45	3.24
	BTCD_v1_1517	BTTAP_v1_10272	-	#N/A	putative anti-sigma-M factor	#N/A	2.02
	BTCD_v1_1592	BTTAP_v1_10199	mdxM	#N/A	bifunctional beta-phosphoglucomutase; glucose-1-phosphate phosphodismutase	#N/A	2.84
	BTCD_v1_1593	BTTAP_v1_10198	mdxK	2.4.1.8	maltose phosphorylase	2.37	3.57
	BTCD_v1_1595	BTTAP_v1_10196	-	#N/A	putative maltose PTS system, IIBC component	#N/A	2.04
	BTCD_v1_1642	BTTAP_v1_10147 (99aa)	-		protein of unknown function	2.21	#N/A
	BTCD_v1_1648	BTTAP_v1_10142 (43aa)	-		protein of unknown function	2.45	2.8
	BTCD_v1_1649	BTTAP_v1_10141 (95aa)	-		putative Immunity protein	2.15	#N/A
	BTCD_v1_1659	BTTAP_v1_10129	-	#N/A	protein of unknown function	#N/A	2.34
	BTCD_v1_1661	BTTAP_v1_10127	-	#N/A	membrane protein of unknown function	#N/A	2.23
	BTCD_v1_1662	BTTAP_v1_10126	-	#N/A	conserved protein of unknown function	#N/A	2.03
	BTCD_v1_1664	BTTAP_v1_10124	-	#N/A	Putative phage tail protein	#N/A	2.02
	BTCD_v1_1698	BTTAP_v1_10090	dat	#N/A	D-alanine aminotransferase	#N/A	2.22
	BTCD_v1_1700	BTTAP_v1_10088	nnrD	4.2.1.136	putative ADP-dependent (S)-NAD(P)H-hydrate dehydratase	2.5	2.09
	BTCD_v1_1706	BTTAP_v1_10082	papA	#N/A	aminopeptidase (Met-Xaa and Xaa-Pro)	#N/A	2.3
	BTCD_v1_1727	BTTAP_v1_10062	-	#N/A	putative late competence protein ComGC	#N/A	2.41
	BTCD_v1_1730	BTTAP_v1_10059	glcK	#N/A	glucose kinase	#N/A	2.37
	BTCD_v1_1771	BTTAP_v1_10016	dtd	#N/A	D-Tyr-tRNATyr deacylase	#N/A	2.11
	BTCD_v1_1922	BTTAP_v1_100082	argD	2.6.1.11	N-acetylornithine aminotransferase	2.7	3.19
	BTCD_v1_1923	BTTAP_v1_100083	argB	2.7.2.8	Acetylglutamate kinase	3.29	3.42
	BTCD_v1_1924	BTTAP_v1_100084	argJ	2.3.1.35, 2.3.1.1	ornithine acetyltransferase; amino-acid acetyltransferase	2.29	#N/A
	BTCD_v1_1930	BTTAP_v1_100089	-		conserved exported protein of unknown function	2.09	#N/A
	BTCD_v1_1935	BTTAP_v1_100094	pheT	#N/A	phenylalanyl-tRNA synthetase (beta subunit)	#N/A	2.02
	BTCD_v1_1943-1945 (fragmentée)	BTTAP_v1_170001	-	#N/A	conserved exported protein of unknown function	#N/A	2.49
	BTCD_v1_1944	BTTAP_v1_100103 (165aa)	-		conserved membrane protein of unknown function	2.49	#N/A
	BTCD_v1_1951	BTTAP_v1_40093	-		putative transposase	2.56	#N/A
	BTCD_v1_1952	Absent (60aa)	-		protein of unknown function	2.29	/
	BTCD_v1_1953	Absent (207aa)	-		putative recombinase resolvase	2.36	/
	BTCD_v1_2004	BTTAP_v1_40001	yvgN	1.1.1.283	methylglyoxal reductase (NADPH-dependent).	2.63	3.89
	BTCD_v1_2039	BTTAP_v1_40034	gpmA	5.4.2.1	phosphoglyceromutase	2.97	3.2
	BTCD_v1_2040	BTTAP_v1_40035	clpB		Chaperone protein ClpB	2.67	2.75
	BTCD_v1_2041		-		fragment of ClpB	2.67	#N/A
	BTCD_v1_2058	BTTAP_v1_40051	addA	#N/A	ATP-dependent deoxyribonuclease (subunit A)	#N/A	2.04
	BTCD_v1_2108	BTTAP_v1_40103	-	1.14.14.3	putative FMN-dependentoxidoreductase	2.56	2.61
	BTCD_v1_2109	BTTAP_v1_40104	mhqA	1.13.11.-	hydroquinone-specific extradiol dioxygenase	2.13	#N/A
	BTCD_v1_2115	BTTAP_v1_40111	yhfP	#N/A	putative quinone oxidoreductase	#N/A	2.37
	BTCD_v1_2121	BTTAP_v1_40117	-		putative zinc-containing alcohol dehydrogenase superfamily (fragment)	2.85	3.42
	BTCD_v1_2137	BTTAP_v1_40130	tiaE	1.1.1.79, 1.1.1.81	2-oxo-carboxylic acid reductase	2.03	2.21
	BTCD_v1_2142	BTTAP_v1_40135	-	#N/A	putative pyruvate oxidase, thiamin-dependent, FAD-binding	#N/A	3.44
	BTCD_v1_2214	BTTAP_v1_60138	-		conserved protein of unknown function	2.18	#N/A
	BTCD_v1_2226	BTTAP_v1_60126	-	#N/A	putative oxidoreductase, NAD-binding domain protein	#N/A	2.99
	BTCD_v1_2296	BTTAP_v1_60058	levD		mannose-specific PTS enzymes: IIA component	5.05	3.87
	BTCD_v1_2297	BTTAP_v1_60057	levE		mannose-specific PTS enzymes: IIB component	4.66	3.37
	BTCD_v1_2298	BTTAP_v1_60056	levF		mannose-specific PTS enzyme IIC component	4.41	3.62
	BTCD_v1_2299	BTTAP_v1_60055	levG		mannose-specific PTS enzyme IID component	3.16	2.82
	BTCD_v1_2343	BTTAP_v1_60010	-		protein of unknown function	2.22	#N/A
	BTCD_v1_2345	BTTAP_v1_60008	-	#N/A	putative lyase/dioxygenase	#N/A	2.02
	BTCD_v1_2369	BTTAP_v1_30208	bglH	3.2.1.86	aryl-phospho-beta-d-glucosidase	2.36	2.53
	BTCD_v1_2370	BTTAP_v1_30207	bglH	3.2.1.86	aryl-phospho-beta-d-glucosidase	2.05	2.38
	BTCD_v1_2378	BTTAP_v1_30200	bglP		PTS system, beta-glucoside-specific IIABC component	3.05	3.11
	BTCD_v1_2392-2393 (fragmenté)	BTTAP_v1_30186	-	#N/A	Alanine dehydrogenase/PNT, domain-containing protein	#N/A	3.39
	BTCD_v1_2407	Absent (44aa)	-		conserved protein of unknown function	2.94	/
	BTCD_v1_2409	BTTAP_v1_30170	thiD	#N/A	phosphomethylpyrimidine kinase, 4-amino-5-hydroxymethyl-2-methylpyrimidine and 4-amino-5-hydroxymethyl-2-methylpyrimidine pyrophosphate kinase	#N/A	2.09
	BTCD_v1_2410	BTTAP_v1_30169	thiM	#N/A	hydroxyethylthiazole kinase	#N/A	2.35
	BTCD_v1_2411	BTTAP_v1_30169 (frgt)	-		protein of unknown function	2.07	#N/A
	BTCD_v1_2417	BTTAP_v1_30163	-	#N/A	putative lyase	#N/A	2.43
	BTCD_v1_2426	BTTAP_v1_30156 (105aa)	-		conserved protein of unknown function	2.26	2.24
	BTCD_v1_2573	BTTAP_v1_30005	lctE	#N/A	L-lactate dehydrogenase	#N/A	3.55
	BTCD_v1_2598	BTTAP_v1_50089	-		protein of unknown function	3.03	#N/A
	BTCD_v1_2599	Absent	-		protein of unknown function	2.72	/
	BTCD_v1_2600	BTTAP_v1_70110	-		conserved protein of unknown function	2.82	#N/A
	BTCD_v1_2602	BTTAP_v1_70108	mtlD	#N/A	mannitol-1-phosphate dehydrogenase	#N/A	2.23
	BTCD_v1_2603	BTTAP_v1_70107	-		putative transcriptional regulator MtlR with PTS EIIAB components	2.15	2.75
	BTCD_v1_2604	BTTAP_v1_70106	mtlA		mannitol-specific PTS enzyme IIABC component	3.5	3.45
	BTCD_v1_2621	BTTAP_v1_70089	-		protein of unknown function	2.4	2.46
	BTCD_v1_misc_RNA_13	BTTAP_v1_miscRNA72	-		RNaseP_bact_b	2.75	3.96
	BTCD_v1_misc_RNA_2	BTTAP_v1_miscRNA35	-		6S	2.77	2.59
	BTCD_v1_misc_RNA_27	BTTAP_v1_miscRNA19	-		TPP	2.06	2.45
	BTCD_v1_misc_RNA_28	BTTAP_v1_miscRNA43	-		TPP	2.17	2.16
	BTCD_v1_misc_RNA_29		-		SRP_bact	2.76	/
	BTCD_v1_misc_RNA_33		-		5S_rRNA	2.63	#N/A
	BTCD_v1_tRNA24	BTTAP_v1_tRNA26	-		Trp tRNA	2.39	2.89
	BTCD_v1_tRNA29	BTTAP_v1_tRNA31	-		Leu tRNA	2.1	2.43
	BTCD_v1_tRNA77	BTTAP_v1_tRNA61	-		Lys tRNA	3.42	-2.05
	BTCD_v1_tRNA83	BTTAP_v1_tRNA62	-		Gly tRNA	3.02	3.5
	BTCD_v1_tRNA85	BTTAP_v1_tRNA56	-		Arg tRNA	3.49	3.7
